# Supplementary material for: Synthesis, cytotoxic activity and drug combination study of tertiary amine derivatives of 2′,4′-dihydroxyl-6′-methoxyl-3′,5′-dimethylchalcone
Source: Royal Society of Chemistry journal article supplement (doi:10.1039/c7ra08639c), 2017-01-01

## Supplementary Information

### Synthesis, cytotoxic activity and drug combination study of tertiary amine derivatives of 2',4'-dihydroxyl-6'-methoxyl-3',5'-dimethylchalcone

Chen Wang,<sup>a, c</sup> Ping Wu,<sup>a</sup> Xiao-Ling Shen,<sup>d</sup> Xiao-Yi Wei,<sup>\*a</sup> and Zi-Hua Jiang<sup>\*b</sup>

<sup>a</sup> Key Laboratory of Plant Resources Conservation and Sustainable Utilization, South China Botanical Garden, Chinese Academy of Sciences, Xingke Road 723, Tianhe District, Guangzhou 510650, People's Republic of China. E-mail: wxy@scbg.ac.cn; Tel: +86-20-37252538 (X.-Y. Wei)

<sup>b</sup> Department of Chemistry, Lakehead University, 955 Oliver Road, Thunder Bay, Ontario P7B 5E1, Canada. E-mail: zjiang@lakeheadu.ca; Tel: +1-807-766-7171 (Z.-H. Jiang)

<sup>c</sup> University of Chinese Academy of Sciences, Yuquanlu 19A, Beijing 100049, People's Republic of China

<sup>d</sup> Laboratory of Herbal Drug Discovery, Tropical Medicine Institute, Guangzhou University of Chinese Medicine, Guangzhou 510405, People's Republic of China

HR-ESIMS, <sup>1</sup>H-NMR, and <sup>13</sup>C-NMR spectra of synthesized compounds (**1**, and **2a–2f**) are provided in the following pages.

# HR-ESIMS of 1

## Mass Spectrum SmartFormula Report

### Analysis Info

Analysis Name: D:\Data\MS\data\201511\wangchen\_ON3-18-2\_pos\_6\_01\_850.d  
 Method: LC\_Direct Infusion\_pos\_100-1000mz.m  
 Sample Name: wangchen\_ON3-18-2\_pos  
 Comment:  
 Acquisition Date: 11/24/2015 10:23:25 PM  
 Operator: SCSIO  
 Instrument / Ser#: maXis 29

### Acquisition Parameter

| Source Type | ESI      | Ion Polarity          | Positive  | Set Nebulizer    | 0.4 Bar   |
|-------------|----------|-----------------------|-----------|------------------|-----------|
| Focus       | Active   | Set Capillary         | 4500 V    | Set Dry Heater   | 180 °C    |
| Scan Begin  | 100 m/z  | Set End Plate Offset  | -500 V    | Set Dry Gas      | 4.0 l/min |
| Scan End    | 2000 m/z | Set Collision Cell RF | 800.0 Vpp | Set Divert Valve | Waste     |

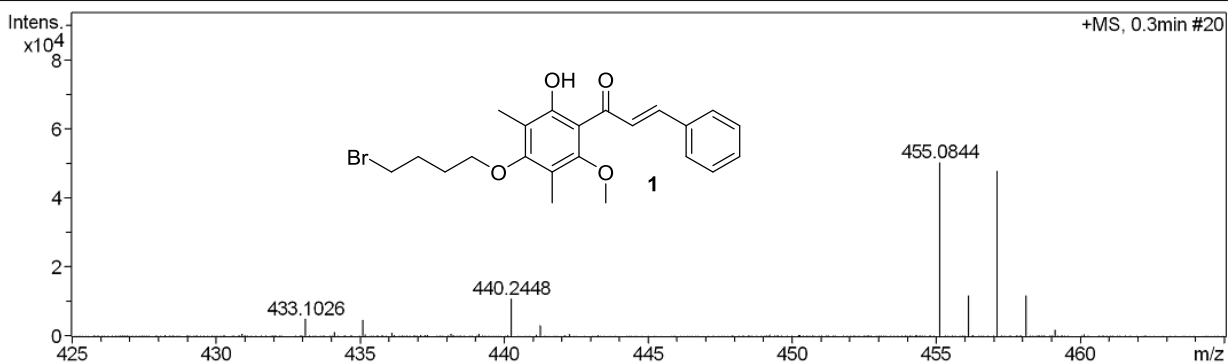

| Meas. m/z | # | Formula               | Score  | m/z      | err [ppm] | err [mDa] | mSigma | rdb  | e <sup>-</sup> Conf | N-Rule |
|-----------|---|-----------------------|--------|----------|-----------|-----------|--------|------|---------------------|--------|
| 433.1026  | 1 | C 22 H 26 Br O 4      | 100.00 | 433.1009 | -4.0      | -1.7      | 40.2   | 9.5  | even                | ok     |
| 455.0844  | 1 | C 22 H 25 Br Na O 4   | 68.85  | 455.0828 | -3.5      | -1.6      | 22.4   | 9.5  | even                | ok     |
| 887.1807  | 1 | C 44 H 50 Br 2 Na O 8 | 8.89   | 887.1765 | -4.8      | -4.2      | 15.1   | 18.5 | even                | ok     |

### <sup>1</sup>H-NMR of 1 in CDCl<sub>3</sub>

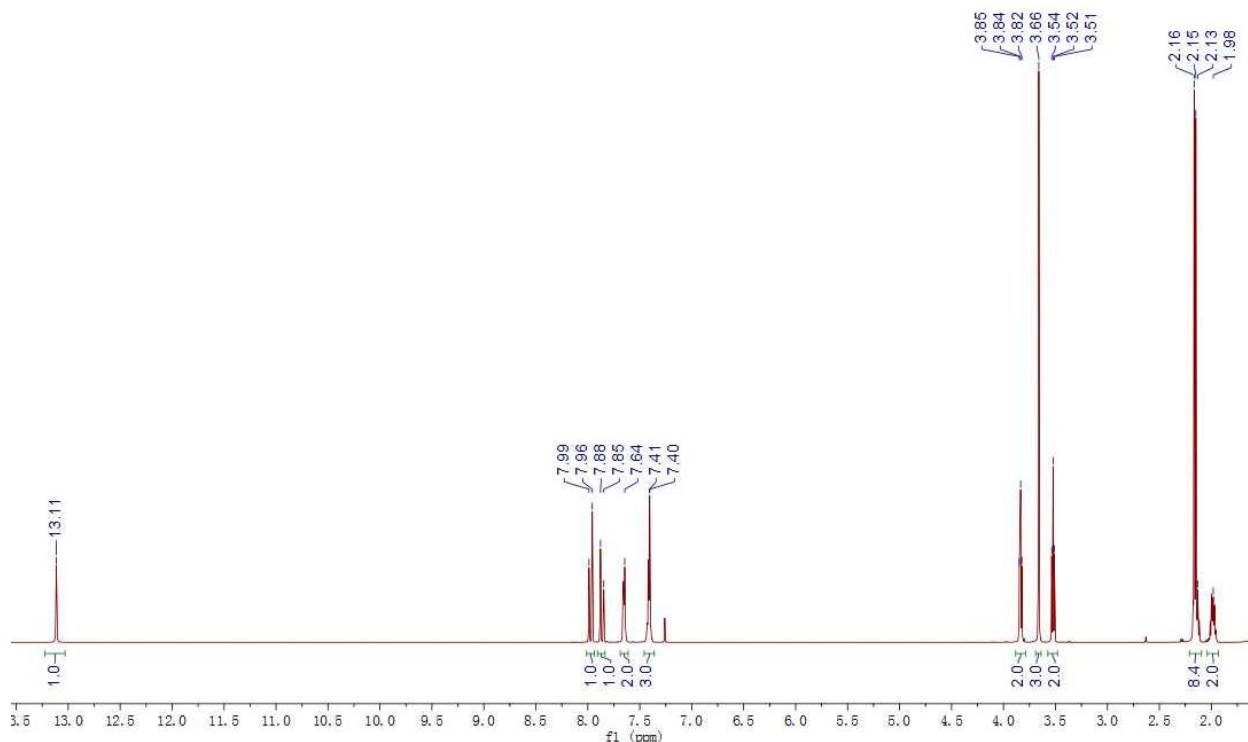

# <sup>13</sup>C-NMR of 1 in CDCl<sub>3</sub>

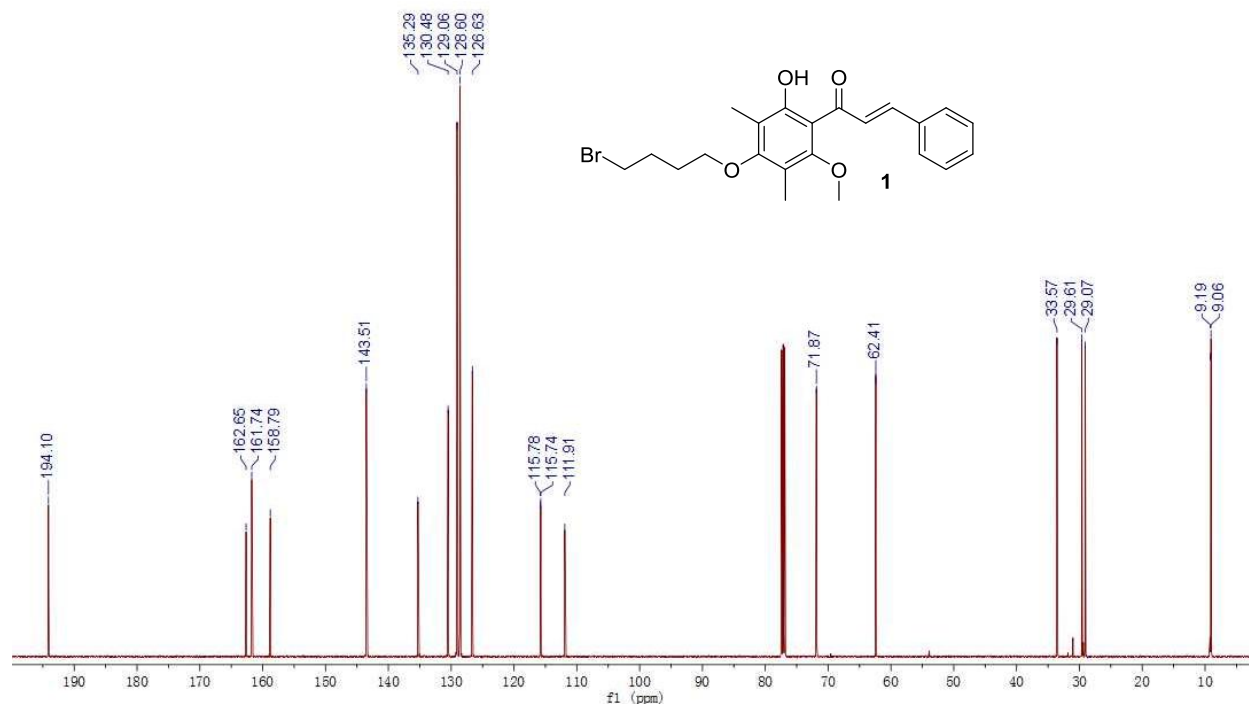

## HR-ESIMS of 2a

### Mass Spectrum SmartFormula Report

#### Analysis Info

Analysis Name: D:\Data\MS\data\201605\wangchen\_ON3-22\_pos\_13\_01\_1739.d  
 Method: LC\_Direct Infusion\_pos\_100-1000mz.m  
 Sample Name: wangchen\_ON3-22\_pos  
 Comment:  
 Acquisition Date: 5/5/2016 5:24:27 PM  
 Operator: SCSIO  
 Instrument / Ser#: maXis 29

#### Acquisition Parameter

| Source Type | ESI      | Ion Polarity          | Positive  | Set Nebulizer    | 0.4 Bar   |
|-------------|----------|-----------------------|-----------|------------------|-----------|
| Focus       | Active   | Set Capillary         | 4500 V    | Set Dry Heater   | 180 °C    |
| Scan Begin  | 100 m/z  | Set End Plate Offset  | -500 V    | Set Dry Gas      | 4.0 l/min |
| Scan End    | 2000 m/z | Set Collision Cell RF | 800.0 Vpp | Set Divert Valve | Waste     |

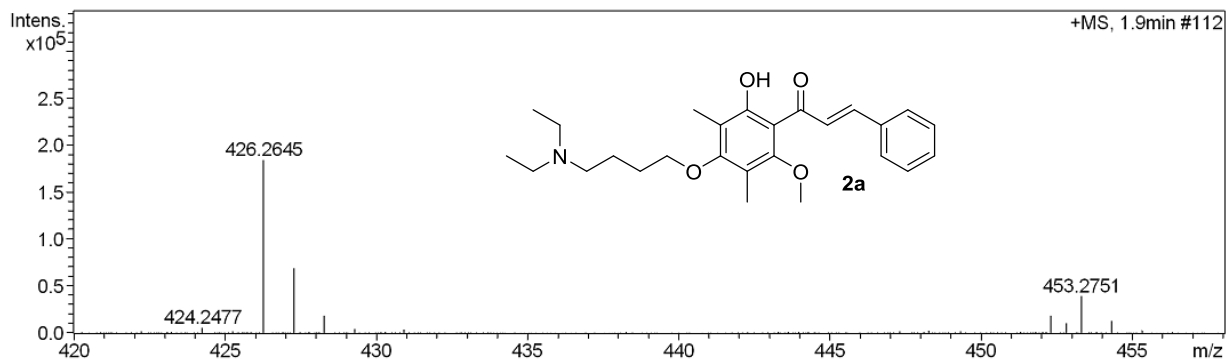

| Meas. m/z | # | Formula            | Score | m/z      | err [ppm] | err [mDa] | mSigma | rdB | e <sup>-</sup> Conf | N-Rule |
|-----------|---|--------------------|-------|----------|-----------|-----------|--------|-----|---------------------|--------|
| 426.2645  | 1 | C 26 H 36 N O 4    | 64.04 | 426.2639 | -1.5      | -0.6      | 55.0   | 9.5 | even                | ok     |
| 448.2451  | 1 | C 26 H 35 N Na O 4 | 1.56  | 448.2458 | 1.6       | 0.7       | 169.1  | 9.5 | even                | ok     |

**$^1\text{H}$ -NMR of 2a in  $\text{CDCl}_3$**

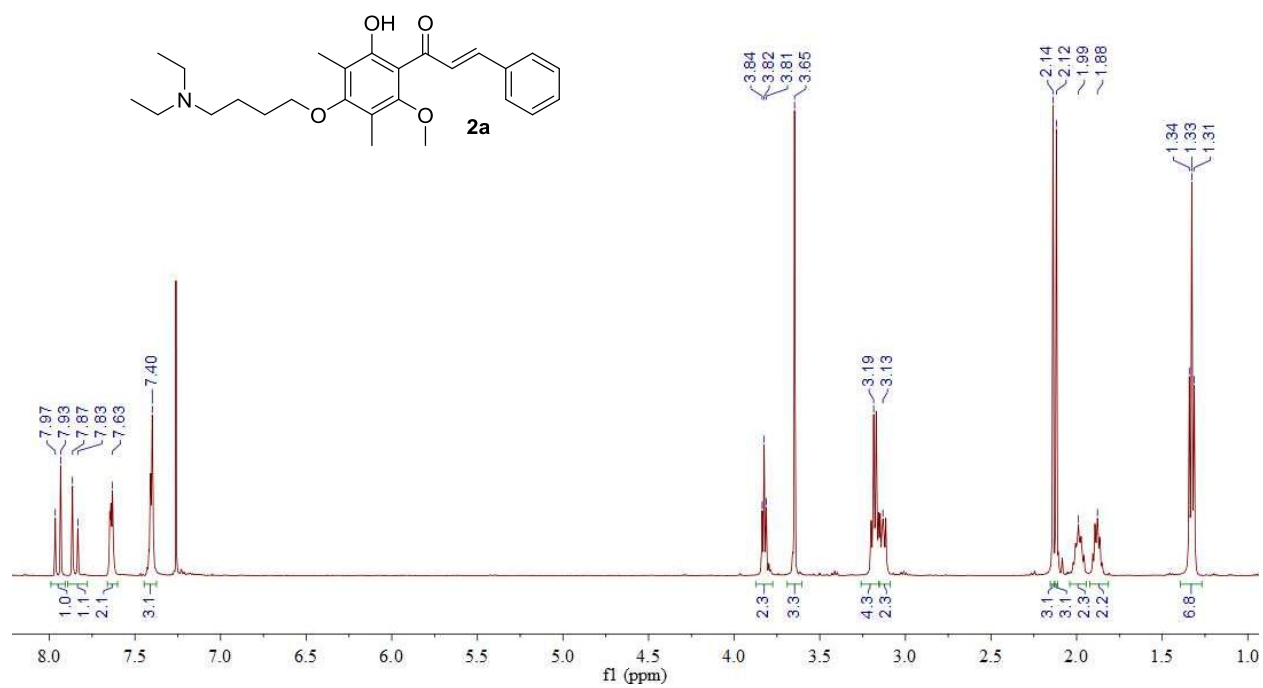

**$^{13}\text{C}$ -NMR of 2a in  $\text{CDCl}_3$**

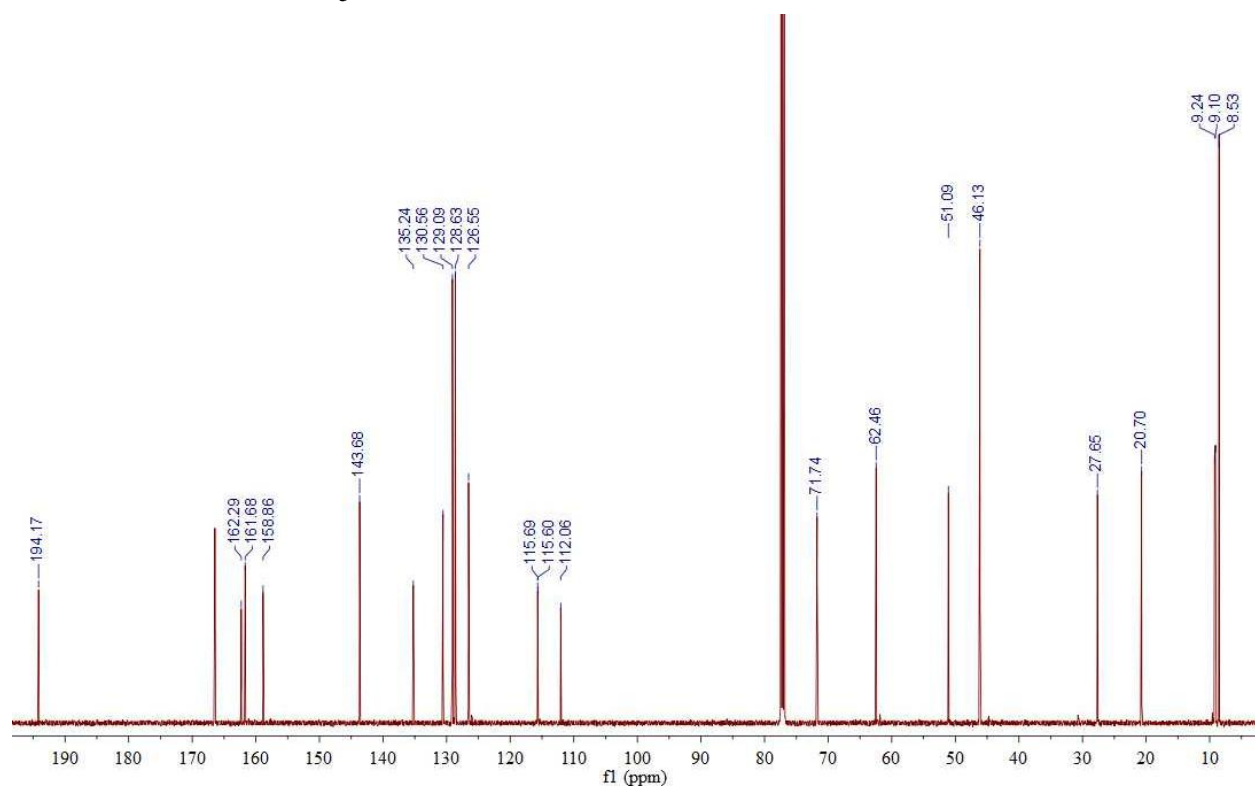

## HR-ESIMS of 2b

### Mass Spectrum SmartFormula Report

#### Analysis Info

Analysis Name D:\Data\MS\data\201605\wangchen\_ON3-23\_pos\_14\_01\_1740.d  
 Method LC\_Direct Infusion\_pos\_100-1000mz.m  
 Sample Name wangchen\_ON3-23\_pos  
 Comment

Acquisition Date 5/5/2016 5:27:50 PM

Operator SCSIO

Instrument / Ser# maXis 29

#### Acquisition Parameter

|             |          |                       |           |                  |           |
|-------------|----------|-----------------------|-----------|------------------|-----------|
| Source Type | ESI      | Ion Polarity          | Positive  | Set Nebulizer    | 0.4 Bar   |
| Focus       | Active   | Set Capillary         | 4500 V    | Set Dry Heater   | 180 °C    |
| Scan Begin  | 100 m/z  | Set End Plate Offset  | -500 V    | Set Dry Gas      | 4.0 l/min |
| Scan End    | 2000 m/z | Set Collision Cell RF | 800.0 Vpp | Set Divert Valve | Waste     |

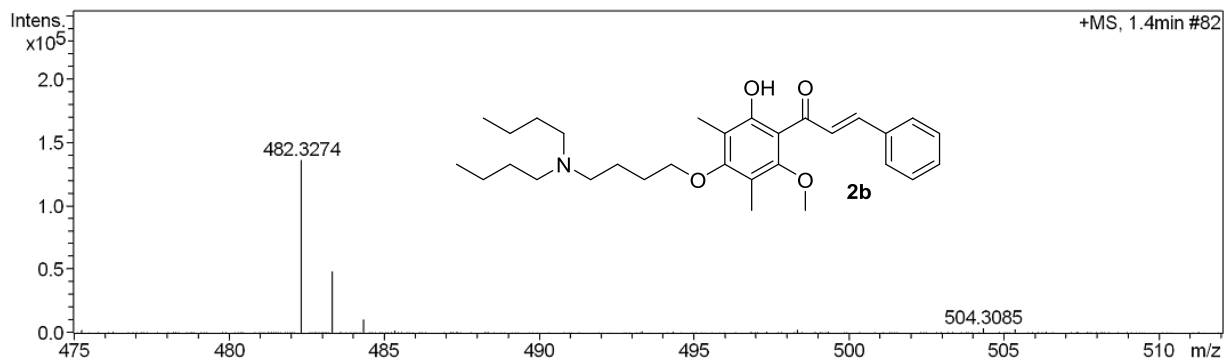

| Meas. m/z | # | Formula            | Score | m/z      | err [ppm] | err [mDa] | mSigma | rdb | e <sup>-</sup> Conf | N-Rule |
|-----------|---|--------------------|-------|----------|-----------|-----------|--------|-----|---------------------|--------|
| 482.3274  | 1 | C 30 H 44 N O 4    | 76.24 | 482.3265 | -1.8      | -0.9      | 10.6   | 9.5 | even                | ok     |
| 504.3085  | 1 | C 30 H 43 N Na O 4 | 78.01 | 504.3084 | -0.2      | -0.1      | 188.4  | 9.5 | even                | ok     |

## <sup>1</sup>H-NMR of 2b in CDCl<sub>3</sub>

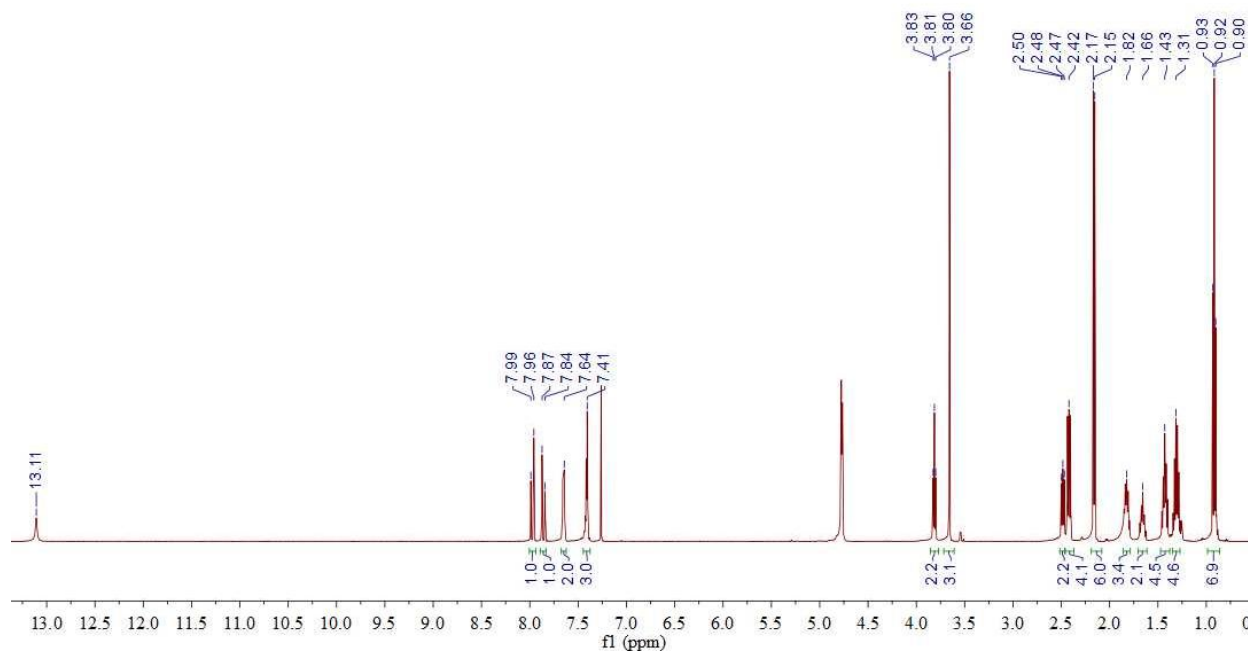

# <sup>13</sup>C-NMR of 2b in CDCl<sub>3</sub>

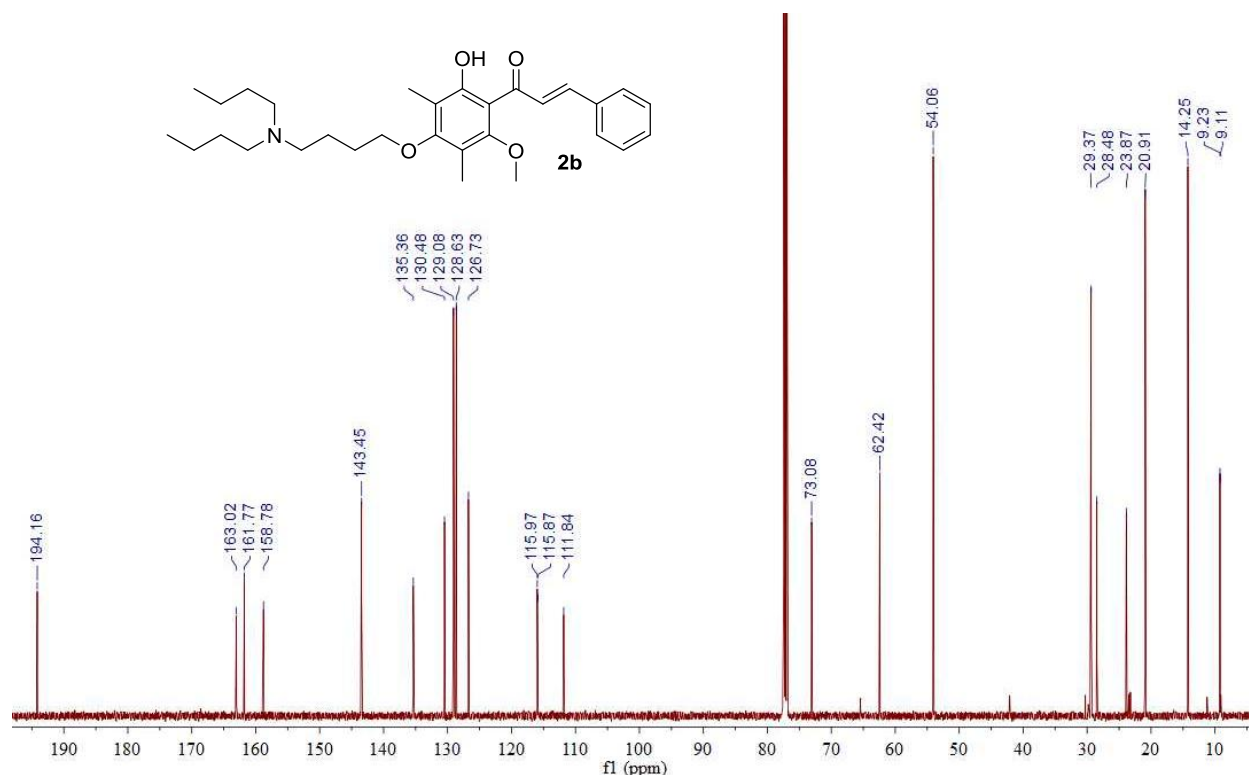

## HR-ESIMS of 2c

### Mass Spectrum SmartFormula Report

#### Analysis Info

Analysis Name D:\Data\MS\data\201605\wangchen\_ON3-19\_pos\_11\_01\_1737.d  
 Method LC\_Direct Infusion\_pos\_100-1000mz.m  
 Sample Name wangchen\_ON3-19\_pos  
 Comment

Acquisition Date 5/5/2016 5:17:42 PM

Operator SCSIO

Instrument / Ser# maXis 29

#### Acquisition Parameter

| Source Type | ESI      | Ion Polarity          | Positive  | Set Nebulizer    | 0.4 Bar   |
|-------------|----------|-----------------------|-----------|------------------|-----------|
| Focus       | Active   | Set Capillary         | 4500 V    | Set Dry Heater   | 180 °C    |
| Scan Begin  | 100 m/z  | Set End Plate Offset  | -500 V    | Set Dry Gas      | 4.0 l/min |
| Scan End    | 2000 m/z | Set Collision Cell RF | 800.0 Vpp | Set Divert Valve | Waste     |

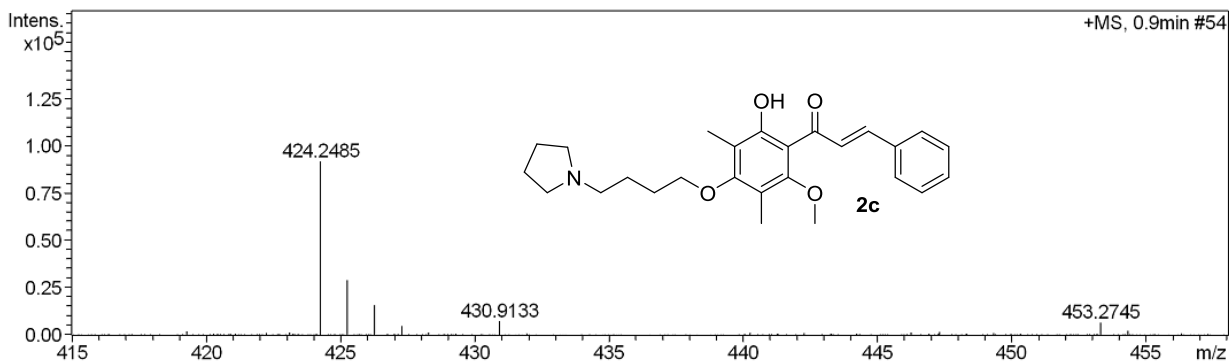

| Meas. m/z | # | Formula            | Score  | m/z      | err [ppm] | err [mDa] | mSigma | rdb  | e <sup>-</sup> Conf | N-Rule |
|-----------|---|--------------------|--------|----------|-----------|-----------|--------|------|---------------------|--------|
| 424.2485  | 1 | C 26 H 34 N O 4    | 100.00 | 424.2482 | -0.7      | -0.3      | 69.7   | 10.5 | even                | ok     |
| 446.2296  | 1 | C 26 H 33 N Na O 4 | 95.72  | 446.2302 | 1.4       | 0.6       | 35.4   | 10.5 | even                | ok     |

**$^1\text{H}$ -NMR of 2c in  $\text{CDCl}_3$**

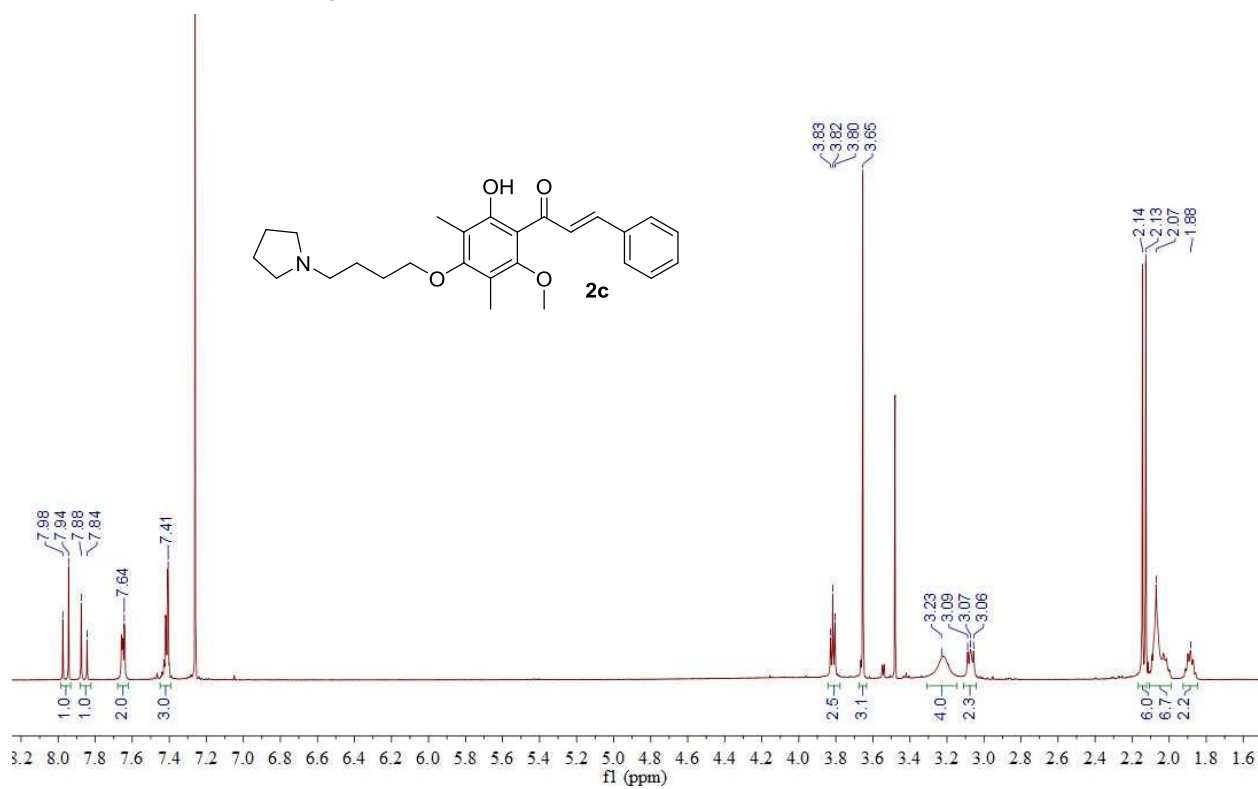

**$^{13}\text{C}$ -NMR of 2c in  $\text{CDCl}_3$**

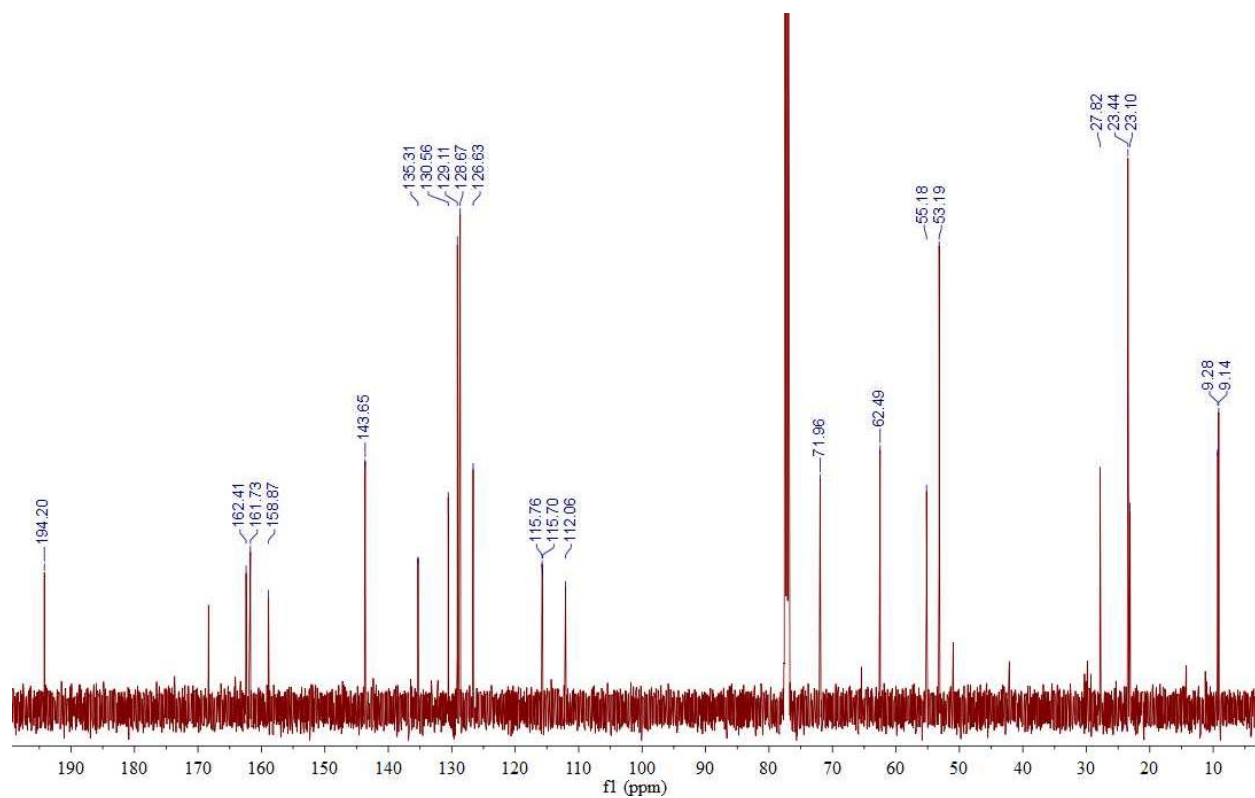

# HR-ESIMS of 2d

## Mass Spectrum SmartFormula Report

### Analysis Info

Analysis Name D:\Data\MS\data\201511\wangchen\_ON3-20-1\_pos\_7\_01\_851.d  
 Method LC\_Direct Infusion\_pos\_100-1000mz.m  
 Sample Name wangchen\_ON3-20-1\_pos  
 Comment

Acquisition Date 11/24/2015 10:26:51 PM

Operator SCSIO

Instrument / Ser# maXis 29

### Acquisition Parameter

|             |          |                       |           |                  |           |
|-------------|----------|-----------------------|-----------|------------------|-----------|
| Source Type | ESI      | Ion Polarity          | Positive  | Set Nebulizer    | 0.4 Bar   |
| Focus       | Active   | Set Capillary         | 4500 V    | Set Dry Heater   | 180 °C    |
| Scan Begin  | 100 m/z  | Set End Plate Offset  | -500 V    | Set Dry Gas      | 4.0 l/min |
| Scan End    | 2000 m/z | Set Collision Cell RF | 800.0 Vpp | Set Divert Valve | Waste     |

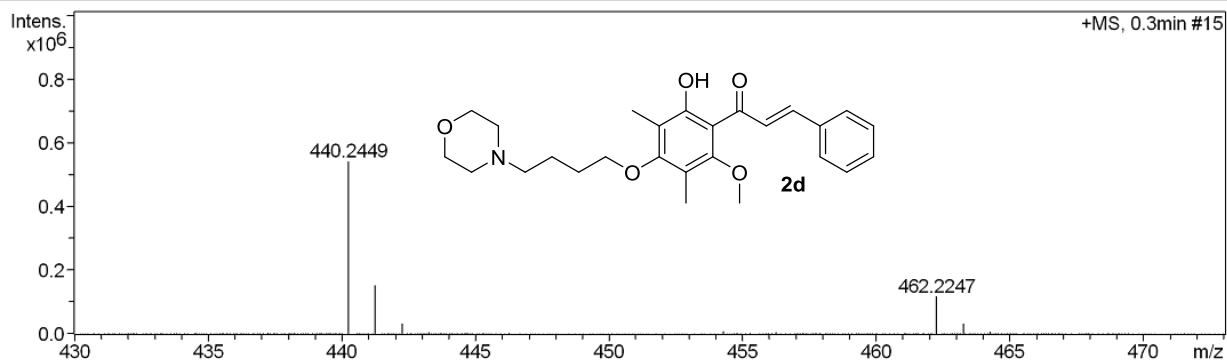

| Meas. m/z | # | Formula            | Score | m/z      | err [ppm] | err [mDa] | mSigma | rdb  | e <sup>-</sup> Conf | N-Rule |
|-----------|---|--------------------|-------|----------|-----------|-----------|--------|------|---------------------|--------|
| 440.2449  | 1 | C 26 H 34 N O 5    | 55.45 | 440.2431 | -3.9      | -1.7      | 7.1    | 10.5 | even                | ok     |
| 462.2247  | 1 | C 26 H 33 N Na O 5 | 84.25 | 462.2251 | 0.9       | 0.4       | 15.6   | 10.5 | even                | ok     |

### <sup>1</sup>H-NMR of 2d in CDCl<sub>3</sub>

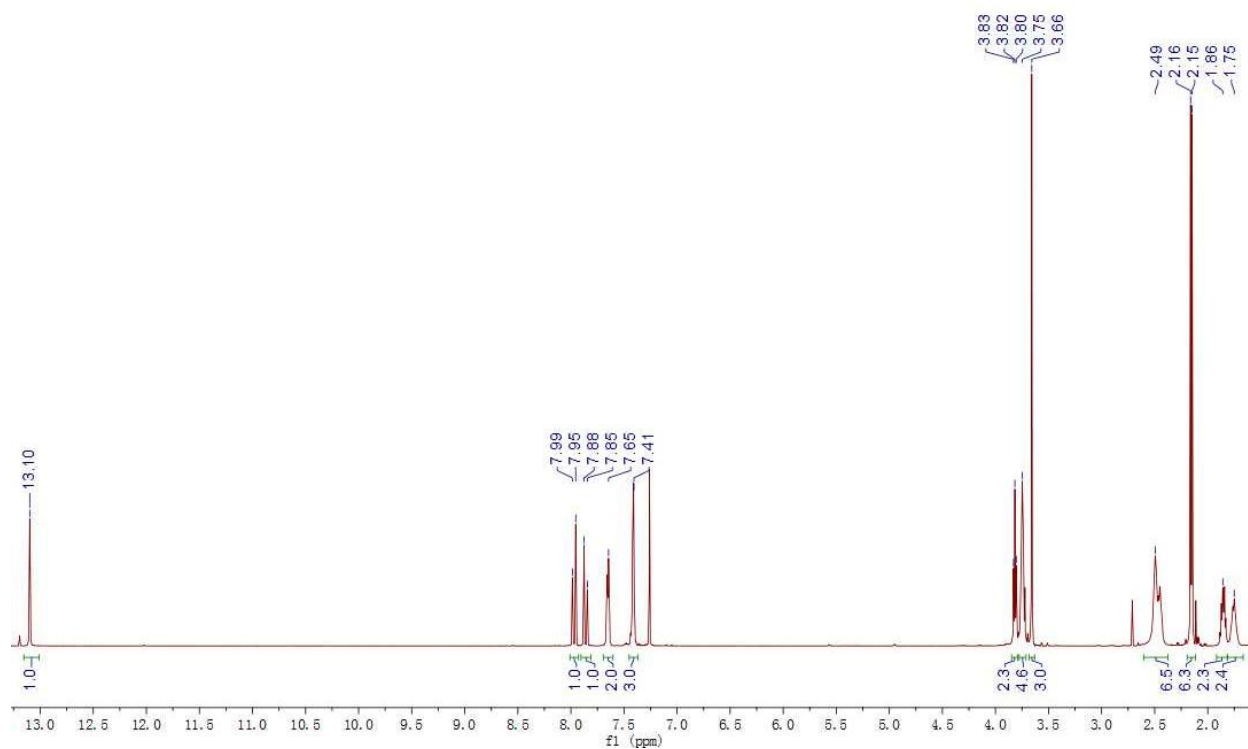



# <sup>13</sup>C-NMR of 2d in CDCl<sub>3</sub>

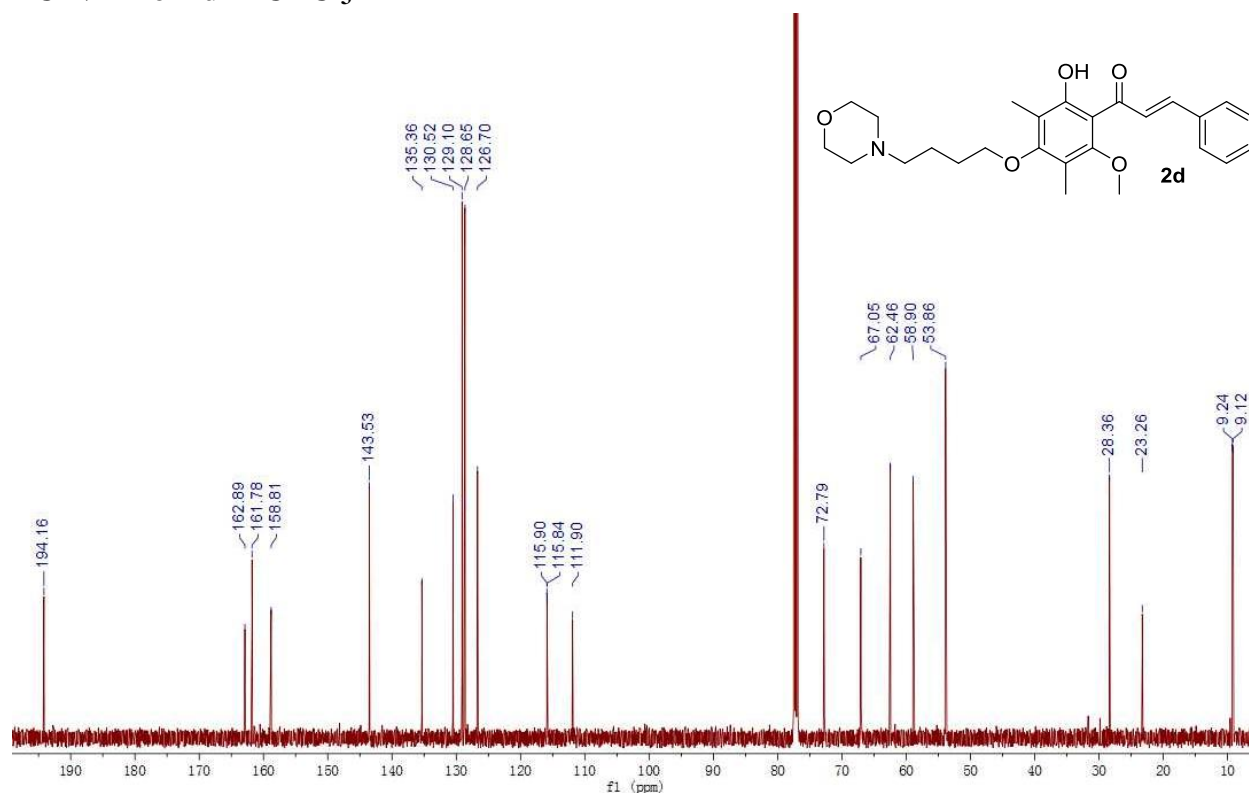

## HR-ESIMS of 2e

### Mass Spectrum SmartFormula Report

#### Analysis Info

Analysis Name: D:\Data\MS\data\201605\wangchen\_ON3-21\_pos\_12\_01\_1738.d  
 Method: LC\_Direct Infusion\_pos\_100-1000mz.m  
 Sample Name: wangchen\_ON3-21\_pos  
 Comment:  
 Acquisition Date: 5/5/2016 5:21:04 PM  
 Operator: SCSIO  
 Instrument / Ser#: maXis 29

#### Acquisition Parameter

| Source Type | ESI      | Ion Polarity          | Positive  | Set Nebulizer    | 0.4 Bar   |
|-------------|----------|-----------------------|-----------|------------------|-----------|
| Focus       | Active   | Set Capillary         | 4500 V    | Set Dry Heater   | 180 °C    |
| Scan Begin  | 100 m/z  | Set End Plate Offset  | -500 V    | Set Dry Gas      | 4.0 l/min |
| Scan End    | 2000 m/z | Set Collision Cell RF | 800.0 Vpp | Set Divert Valve | Waste     |

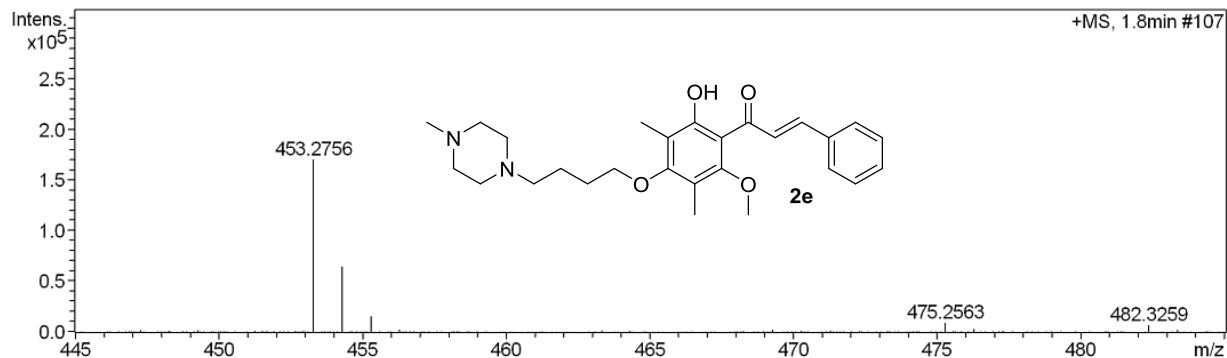

| Meas. m/z | # | Formula              | Score | m/z      | err [ppm] | err [mDa] | mSigma | rdb  | e <sup>-</sup> Conf | N-Rule |
|-----------|---|----------------------|-------|----------|-----------|-----------|--------|------|---------------------|--------|
| 453.2756  | 1 | C 27 H 37 N 2 O 4    | 67.67 | 453.2748 | -1.7      | -0.8      | 39.6   | 10.5 | even                | ok     |
| 475.2563  | 1 | C 27 H 36 N 2 Na O 4 | 92.37 | 475.2567 | 0.8       | 0.4       | 13.9   | 10.5 | even                | ok     |

**<sup>1</sup>H-NMR of 2e in CDCl<sub>3</sub>**

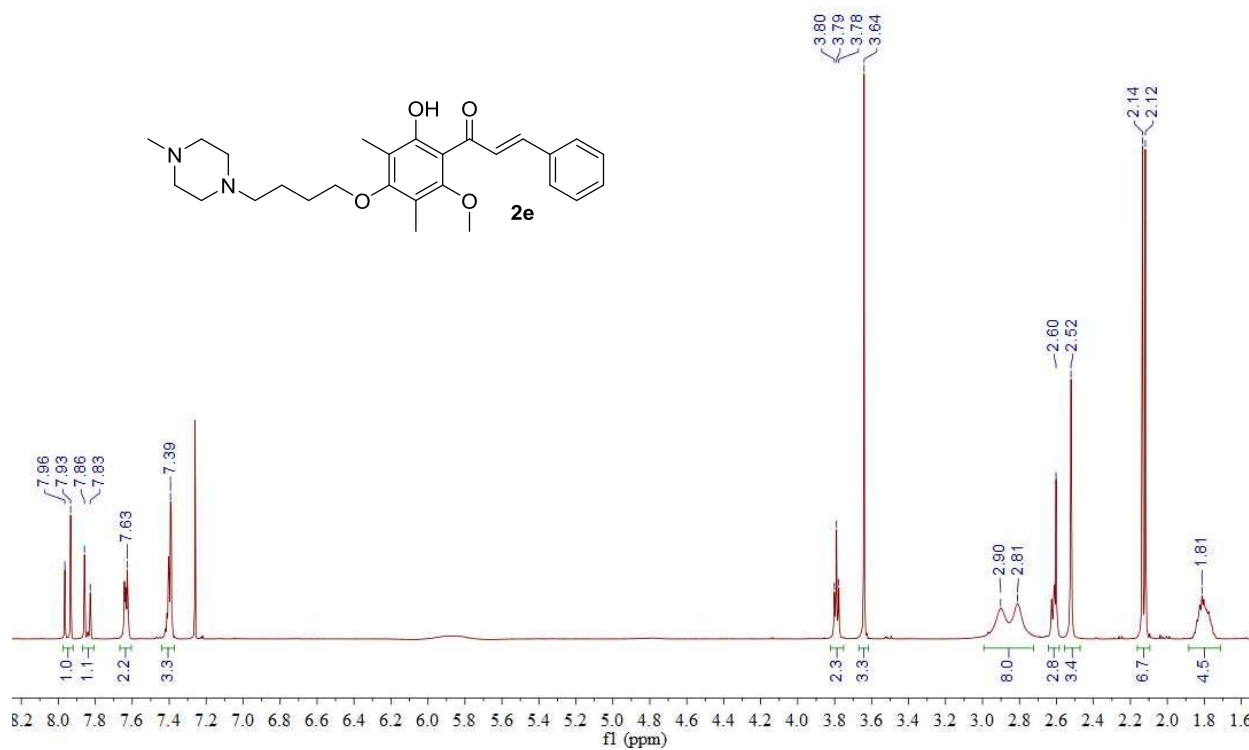

**<sup>13</sup>C-NMR of 2e in CDCl<sub>3</sub>**

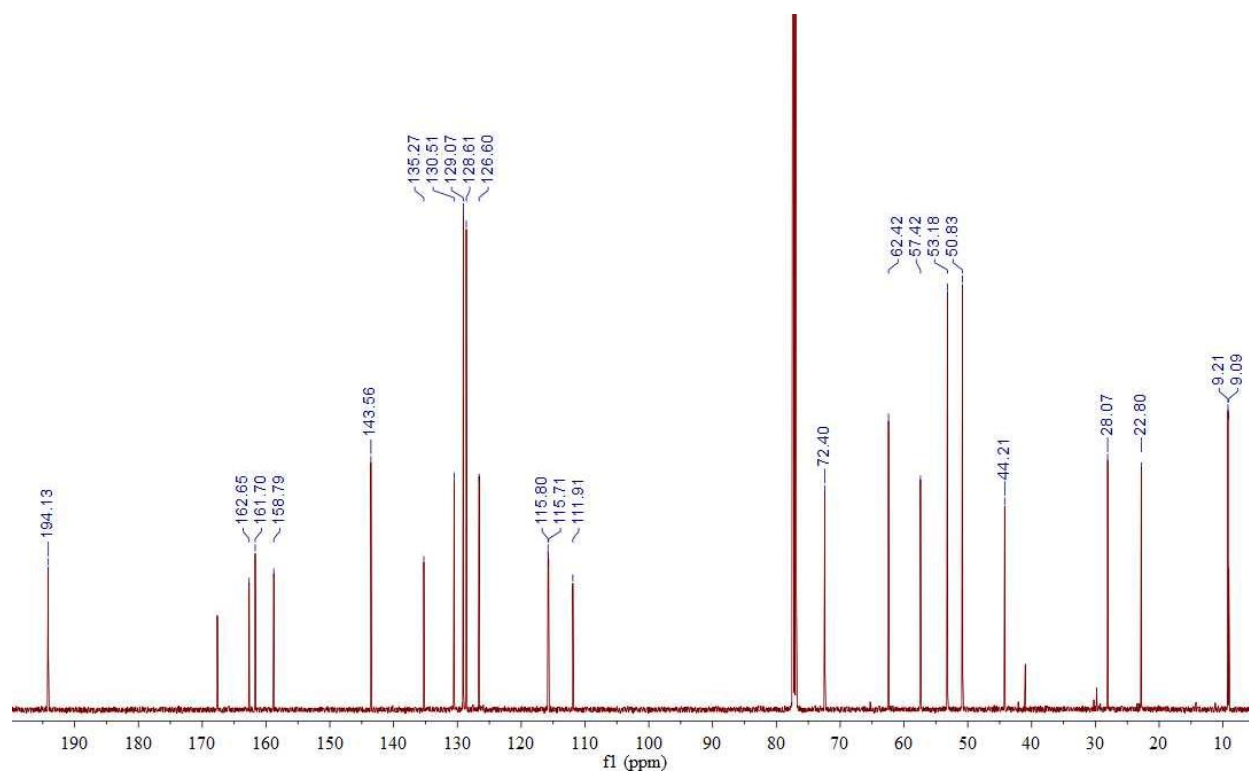

# HR-ESIMS of 2f

## Mass Spectrum SmartFormula Report

### Analysis Info

Analysis Name D:\Data\MS\data\201605\wangchen\_ON3-25\_pos\_15\_01\_1741.d Acquisition Date 5/5/2016 5:31:14 PM  
 Method LC\_Direct Infusion\_pos\_100-1000mz.m Operator SCSIO  
 Sample Name wangchen\_ON3-25\_pos Instrument / Ser# maXis 29  
 Comment

### Acquisition Parameter

Source Type ESI Ion Polarity Positive Set Nebulizer 0.4 Bar  
 Focus Active Set Capillary 4500 V Set Dry Heater 180 °C  
 Scan Begin 100 m/z Set End Plate Offset -500 V Set Dry Gas 4.0 l/min  
 Scan End 2000 m/z Set Collision Cell RF 800.0 Vpp Set Divert Valve Waste

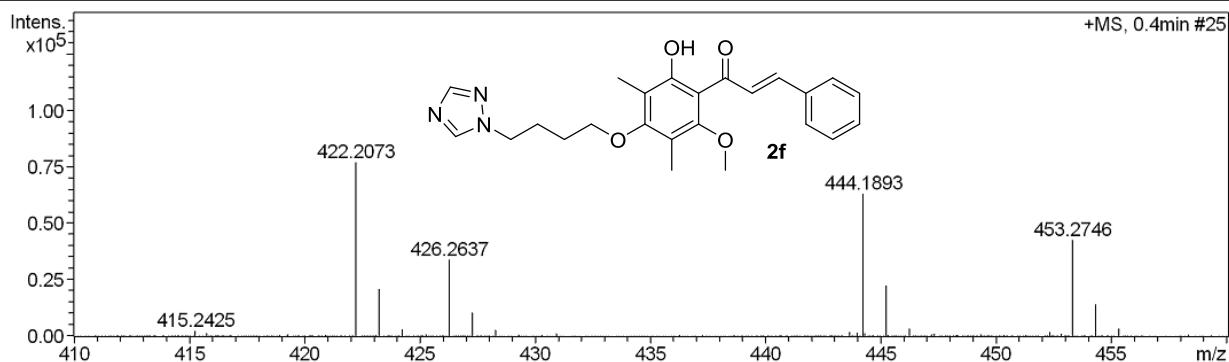

| Meas. m/z | # | Formula              | Score  | m/z      | err [ppm] | err [mDa] | mSigma | rdb  | e <sup>-</sup> Conf | N-Rule |
|-----------|---|----------------------|--------|----------|-----------|-----------|--------|------|---------------------|--------|
| 422.2073  | 1 | C 24 H 28 N 3 O 4    | 100.00 | 422.2074 | 0.3       | 0.1       | 3.1    | 12.5 | even                | ok     |
| 444.1893  | 1 | C 24 H 27 N 3 Na O 4 | 100.00 | 444.1894 | 0.2       | 0.1       | 47.6   | 12.5 | even                | ok     |

### <sup>1</sup>H-NMR of 2f in CDCl<sub>3</sub>

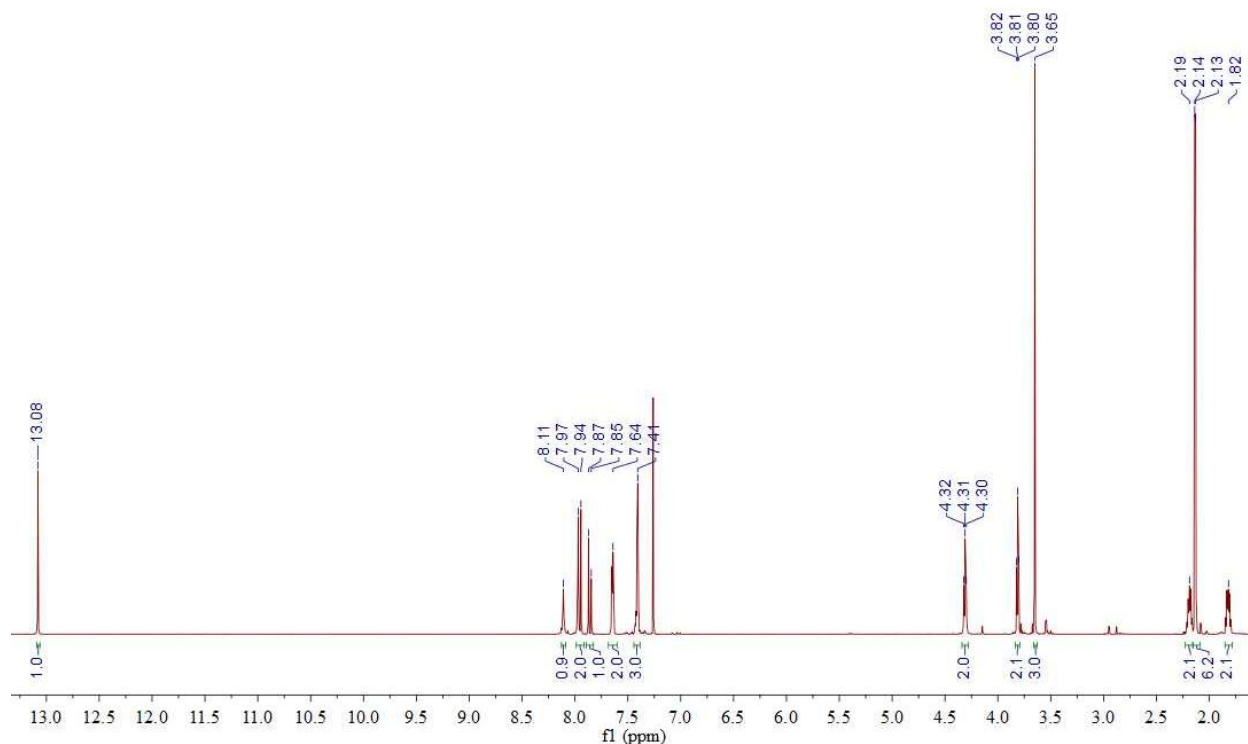

<sup>13</sup>C-NMR of 2f in CDCl<sub>3</sub>

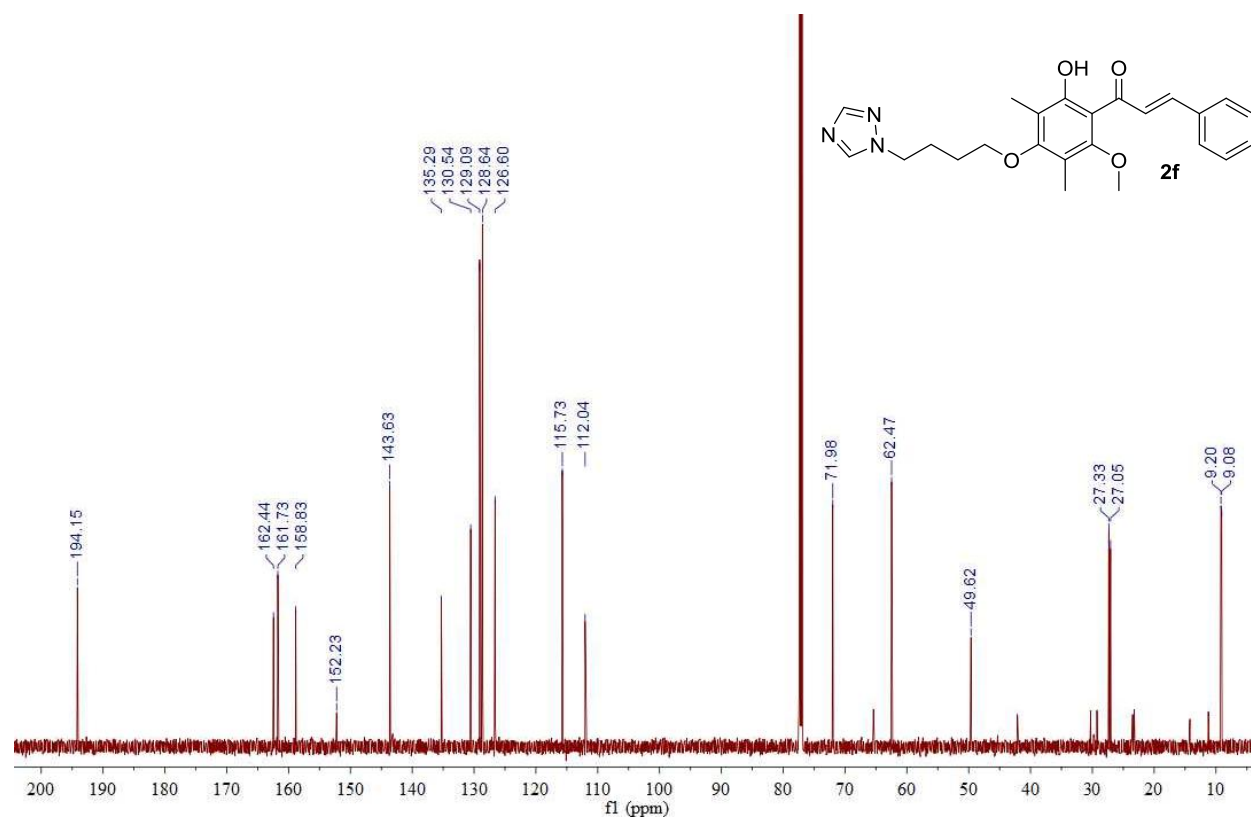

Supplement: c7ra08639c1.pdf [file c7ra08639c1.pdf]
